# Supplementary material for: Osmotic Engine: Translating Osmotic Pressure into Macroscopic Mechanical Force via Poly(Acrylic Acid) Based Hydrogels
Source: PubMed Central journal article supplement (PMC5604390; doi:10.1002/advs.201700112), 2017-05-30
Supplement: ADVS-4-na-s001.pdf [file ADVS-4-na-s001.pdf]

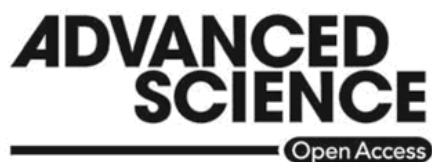

## Supporting Information

for *Adv. Sci.*, DOI: 10.1002/adv.201700112

**Osmotic Engine: Translating Osmotic Pressure into  
Macroscopic Mechanical Force via Poly(Acrylic Acid) Based  
Hydrogels**

*Lukas Arens, Felix Weißenfeld, Christopher O. Klein, Karin  
Schlag, and Manfred Wilhelm\**

## Supporting Information

### **Osmotic Engine: Translating Osmotic Pressure into Macroscopic Mechanical Force via Poly(acrylic acid) Based Hydrogels**

*Lukas Arens, Felix Weißenfeld, Christopher O. Klein, Karin Schlag, Manfred Wilhelm\**

Movie S1: Time lapse recording of several swelling and shrinking cycles. In the experiment, 10 g of a commercial hydrogel (RD 474), consisting of particles in the size of 370 – 670  $\mu\text{m}$ , were alternately exposed to deionized water and a 4.3 wt% NaCl solution to lift a weight of 1.5 kg. In the video, the time lapse is 1:375, resulting in a swelling-shrinking time of about 60 minutes.
